# Supplementary material for: Critical role of CD4+ T cells and IFNγ signaling in antibody-mediated resistance to Zika virus infection
Source: PubMed Central journal article supplement (PMC6081430; doi:10.1038/s41467-018-05519-4), 2018-08-07
Supplement: 41467_2018_5519_MOESM1_ESM.pdf [file 41467_2018_5519_MOESM1_ESM.pdf]

**Supplementary Information for “Critical role of CD4<sup>+</sup> T cells and IFN $\gamma$  signaling in antibody-mediated resistance to Zika-Virus infection” by Lucas, kitoko et al.**

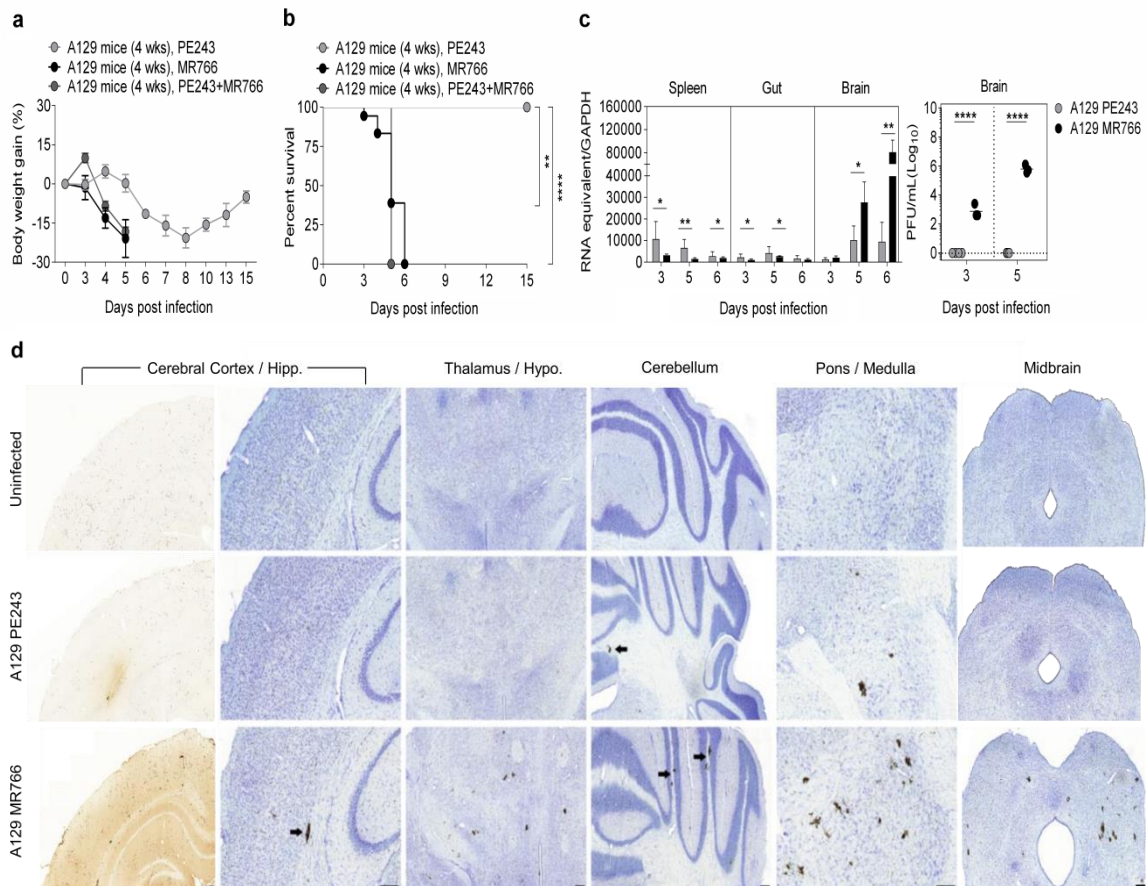

**Supplementary Fig. 1** ZIKV MR766 induces a lethal infection in A129 mice. Four week old A129 mice were inoculated intravenously with  $2 \times 10^5$  PFU of ZIKV PE243 ( $n = 7$ ), MR766 ( $n = 26$ ), or both ( $n = 4$ ). All infected mice were monitored for up to 15 days post infection. **a** body weight gain and **b** lethality of A129 infected mice. **c** ZIKV RNA copies in the spleen, gut, and brain at days 3, 5 and 6 post infection and presence of infectious particles of ZIKV in the brain at 3 and 5 days post infection. The horizontal dotted line indicates the limit of detection. **d** Representative photomicrographs showing the pattern of IgG staining (in brown) and DAB staining in coronal brain sections obtained from ZIKV PE243 or MR766-infected mice at day 5 post infection. Uninfected mice were used as control. The arrow points to a focus of microhemorrhage in the white matter. Scale bar: 200  $\mu\text{m}$ . Results are shown only as mean in **c** or as mean  $\pm$  standard deviation in **a** and **c**. Data are presented as a pool of two to four independent experiments in **a** and **b**, experiment were performed once in **c**. Survival data were analyzed by Log rank test. Data were analyzed by Student's t-test. (\*)  $p \leq .05$ ; (\*\*)  $p \leq .01$ ; (\*\*\*\*)  $p \leq .0001$ . Hypo, hypothalamus; hipp., hippocampus.

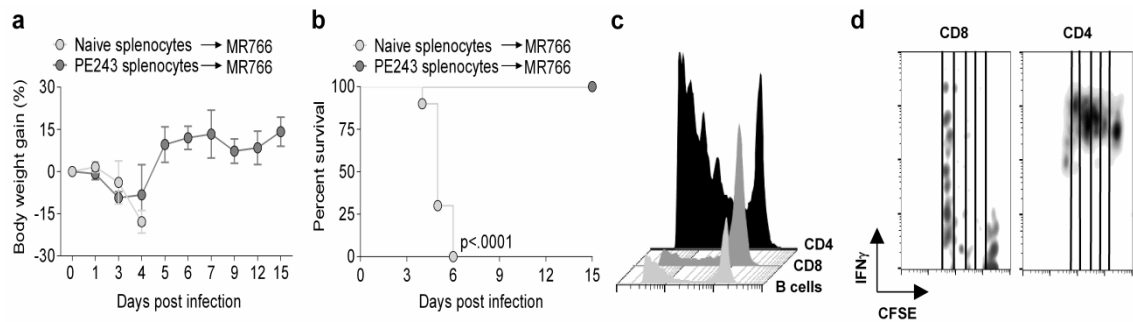

**Supplementary Fig. 2** ZIKV PE243-immune splenocytes protect against ZIKV MR766. Recipient A129 mice were inoculated intravenously with  $2 \times 10^5$  PFU of lethal ZIKV MR766 simultaneously to the receipt of splenocytes obtained from ZIKV strain PE243 infected-A129 donor mice at 7 days post infection. Uninfected mice were used as donor of naive splenocytes. **a** Body weight gain and **b** lethality of A129 recipient mice that received PE243-immune ( $n = 9$ ) or naive splenocytes ( $5 \times 10^7$ /mouse) ( $n = 10$ ) monitored for up to 15 days post infection. **c** Donor PE243-immune splenocytes were stained with CFSE to assess proliferation of donor B cells, CD4<sup>+</sup> and CD8<sup>+</sup> T cells and **d** IFN $\gamma$  producing CD4<sup>+</sup> and CD8<sup>+</sup> T cells in the spleen of recipient mice by flow cytometry at 3 days post infection. Survival data were analyzed by Log rank test. Results are shown as mean  $\pm$  standard deviation in **a**. Data are representative of four independent experiments in **a** and **b** or two independent experiments in **c** and **d**.

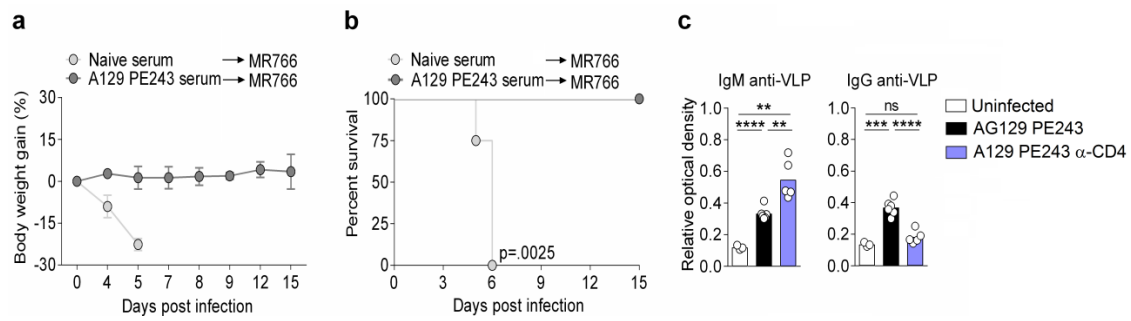

**Supplementary Fig. 3** ZIKV PE243-immune serum protects against ZIKV MR766. Serum obtained from ZIKV PE243-infected A129 mice at 7 days post infection were administrated intravenously (150–200  $\mu$ L) to ZIKV MR766-infected A129 mice ( $2 \times 10^5$  PFU, i.v). Uninfected A129 mice were used as donor of naive serum. **a** Body weight gain and **b** lethality of recipient mice that received A129 PE243 serum ( $n = 8$ ) or naive serum ( $n = 4$ ) were monitored for up to 15 days post infection. **c** Serum IgM and IgG anti-ZIKV VLPs in uninfected mice ( $n = 3$ ), ZIKV PE243-infected AG129 mice ( $n = 6$ ) and ZIKV PE243-infected A129 mice previously depleted of CD4<sup>+</sup> T cells ( $n = 5$ ). Results are represented as relative optical density by performing the ratio with ZIKV strain PE243-infected A129 mean values for IgG or IgM ( $\frac{x \text{ group O.D.sum value}}{A129 \text{ PE243 O.D.sum mean value}}$ ). Results are shown only as mean in **c** or as mean  $\pm$  standard deviation in **a**. Data are representative of four independent experiments in **a** and **b** or two independent experiments in **c**. Survival data were analyzed by Log rank test. Data were analyzed by Student's t-test in **c**. (\*\*)  $p \leq .01$ .; (\*\*\*)  $p \leq .001$ .; (\*\*\*\*)  $p \leq .0001$ .; not significant (ns).

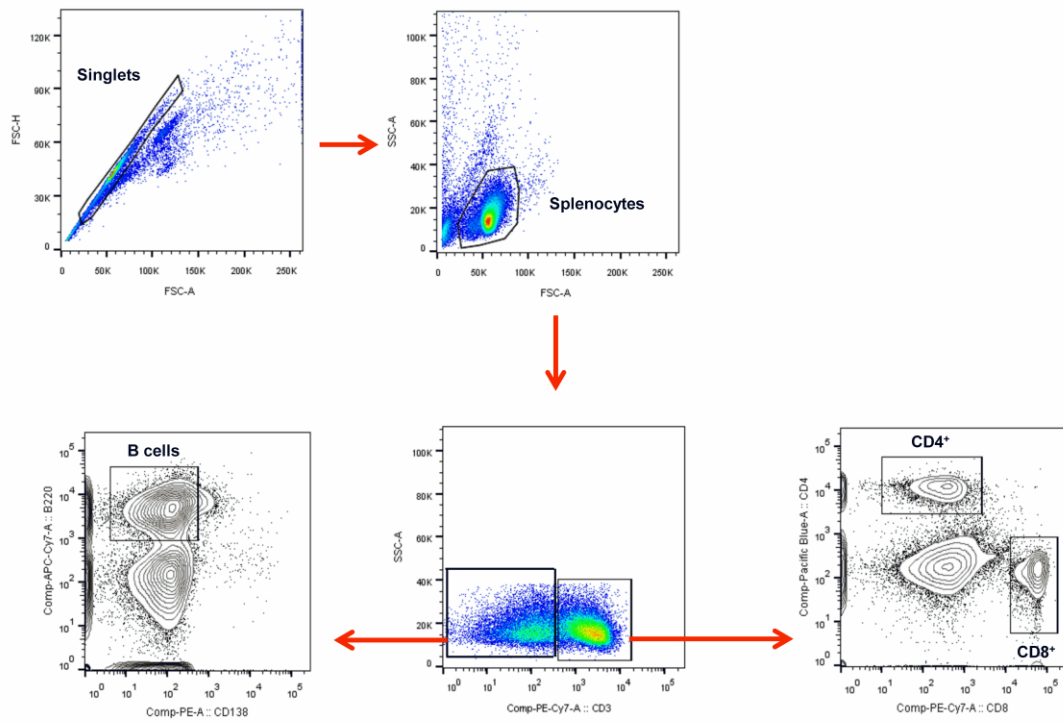

**Supplementary Fig. 4** Gate strategies for lymphocyte isolation by FACS. Single cells were gated based on FSC-H x FSC-A plot. Inside single cells, splenocytes were gated in a SSC-A x FSC-A plot. CD3<sup>+</sup> and CD3<sup>-</sup> populations were gated inside splenocytes. CD4<sup>+</sup>CD8<sup>-</sup> (CD4<sup>+</sup> T cells) and CD8<sup>+</sup>CD4<sup>-</sup> (CD8<sup>+</sup> T cells) populations were obtained inside CD3<sup>+</sup> gate, while B220<sup>+</sup>CD138<sup>-</sup> (B cells) population was obtained inside CD3<sup>-</sup> gate.

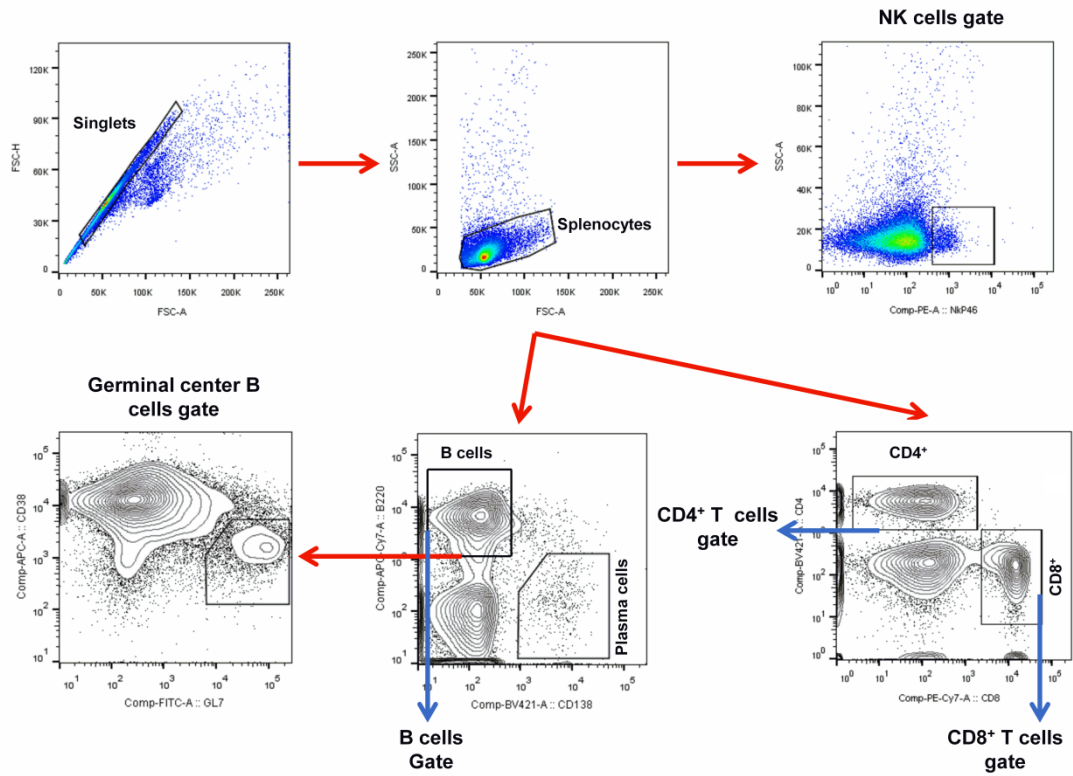

**Supplementary Fig. 5** Gate strategies for lymphocytes analyses. Single cells were gated based on FSC-H x FSC-A plot. Inside single cells, splenocytes were gated in a SSC-A x FSC-A plot. Five distinct populations were analyzed inside splenocytes, NKp46<sup>+</sup> (NK cells), CD4<sup>+</sup>CD8<sup>-</sup> (CD4<sup>+</sup> T cells), CD8<sup>+</sup>CD4<sup>-</sup> (CD8<sup>+</sup> T cells), B220<sup>+</sup>CD138<sup>-</sup> (B cells), and B220<sup>-</sup>CD138<sup>+</sup> (plasma cells). Germinal center B cells were analyzed inside B cells gate. Whenever indicate in the results section, cytokines, cytotoxic factors, transcription factors, activation markers or subpopulations of lymphocytes were analyzed inside the populations showed above.

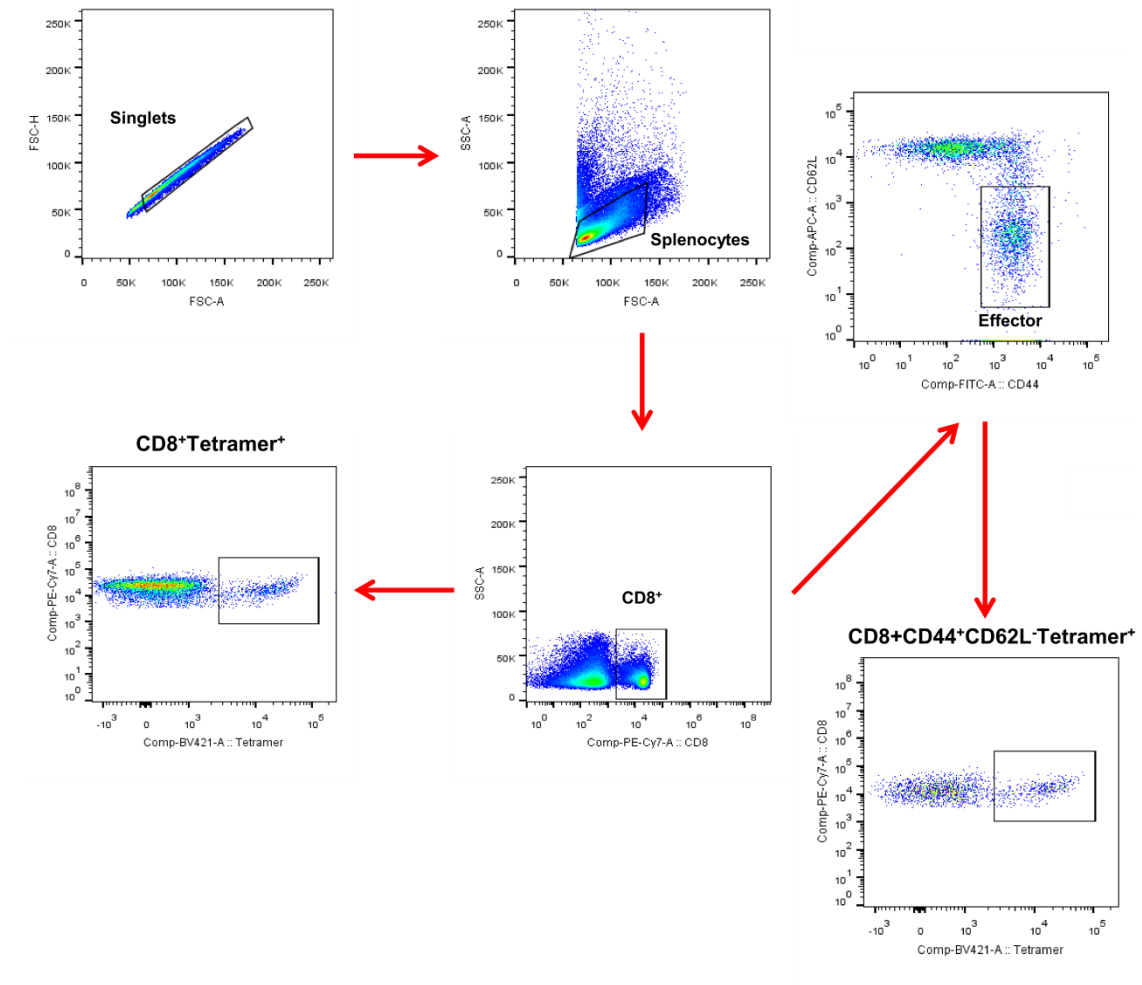

**Supplementary Fig. 6** Gate strategies for protein E tetramer analyses. Single cells were gated based on FSC-H x FSC-A plot. Inside single cells, splenocytes were gated in a SSC-A x FSC-A plot. CD8<sup>+</sup> T cells population (CD8<sup>+</sup>) was analyzed inside splenocytes gate. Tetramer positive cells were analyzed inside total CD8<sup>+</sup> or effector CD8<sup>+</sup>CD44<sup>+</sup>CD62L<sup>-</sup> T cell populations.

| ANTIBODIES                  | DILUTION | SOURCE                            | REF. NUMBER       |
|-----------------------------|----------|-----------------------------------|-------------------|
| Anti-B220-BV605             | 1:200    | (BioLegend Clone: RA3-6B2)        | Cat# 103244       |
| Anti-CD107a-Alexa Fluor 488 | 1:100    | (eBioscience Clone: eBio1D4B)     | Cat# 53-1071-82   |
| Anti-CD138-BV421            | 1:200    | (BioLegend Clone: 281-2)          | Cat# 142523       |
| Anti-CD185 (CXCR5)-PE       | 1:200    | (BioLegend Clone: L138D7)         | Cat# 145503       |
| Anti-CD25-APC               | 1:200    | (eBioscience Clone: PC61.5)       | Cat# 17-0251-81A  |
| Anti-CD3-PEcy7              | 1:200    | (eBioscience Clone: 145-2C11)     | Cat# 25-0031-82   |
| Anti-CD38-APC               | 1:200    | (BioLegend Clone: 90)             | Cat# 102712       |
| Anti-CD4-eFluor450          | 1:200    | (eBioscience Clone: RM4-5)        | Cat# 48-0042-82   |
| Anti-CD4-APC                | 1:200    | (eBioscience Clone: GK1.5)        | Cat# 17-0041-82   |
| Anti-CD4-PEcy5              | 1:200    | (eBioscience Clone: GK1.5)        | Cat# 15-0041-82   |
| Anti-CD4-PE                 | 1:200    | (eBioscience Clone: RM4-5)        | Cat# 12-0043-82   |
| Anti-CD44-PerCP-Cy5.5       | 1:200    | (BioLegend Clone: IM7)            | Cat# 103032       |
| Anti-CD44-PE                | 1:200    | (eBioscience Clone: IM7)          | Cat# 12-0441-82   |
| Anti-CD62L-BV421            | 1:200    | (BioLegend Clone: MEL-14)         | Cat# 104436       |
| Anti-CD62L-APC              | 1:200    | (Tonbo biosciences Clone: MEL-14) | Cat# 20-0621-U100 |
| Anti-CD8 $\alpha$ -PEcy7    | 1:200    | (Tonbo biosciences Clone: 53-6.7) | Cat# 60-0081-U100 |
| Anti-CD8 $\alpha$ -APC      | 1:200    | (eBioscience Clone: 53-6.7)       | Cat# 17-0081-81   |
| Anti-GL-7-Alexa Fluor 488   | 1:200    | (BioLegend Clone: GL7)            | Cat# 144612       |
| Anti-IgG Fc-PE              | 1:200    | (Jackson ImmunoResearch Lab)      | -----             |
| Anti-NKp46-PE               | 1:80     | (eBioscience Clone: 29A14)        | Cat# 12-3351-82   |
| Anti-PD-1-BV605             | 1:80     | (BioLegend Clone: 29F.1A12)       | Cat# 135219       |

**Supplementary Table 1** Antibodies used for cell surface staining. Monoclonal antibodies conjugated with fluorochromes used for lymphocyte surface's immunophenotyping and dilution, source, and reference numbers of antibodies.



| ANTIBODIES                  | DILUTION | SOURCE                                    | REF. NUMBER       |
|-----------------------------|----------|-------------------------------------------|-------------------|
| Anti-Foxp3-Alexa Fluor 488  | 1:100    | (Thermo Fisher Scientific Clone: FJK-16s) | Cat# 53-5773-80   |
| Anti-Grzm B-Alexa Fluor 647 | 1:200    | (BioLegend Clone: GB11)                   | Cat# 515405       |
| Anti-IFN $\gamma$ -APC      | 1:100    | (Tonbo biosciences Clone: XMG1.2)         | Cat# 20-7311-U100 |
| Anti-IL-17-PE               | 1:100    | (eBioscience Clone: eBio 17B7)            | Cat# 12-7177-81   |
| Anti-IL-2-PE                | 1:100    | (BD Pharmingen Clone: JES6-5H4)           | Cat# 18175Z       |
| Anti-IL-4-APC               | 1:100    | (Tonbo biosciences Clone: 11B11)          | Cat# 20-7041-U100 |
| Anti-Perforin-PE            | 1:100    | (eBioscience Clone: eBioMAK-D)            | Cat# 12-9392-80   |
| Anti-TNF $\alpha$ -PE       | 1:100    | (eBioscience Clone: MP6-XT22)             | Cat# 12-7321-82   |

**Supplementary Table 2** Antibodies used for staining of permeabilized cells. Monoclonal antibodies conjugated with fluorochromes used for lymphocyte internal immunophenotyping and dilution, source, and reference numbers of antibodies.
